# Supplementary material for: In vivo reprogrammed pluripotent stem cells from teratomas share analogous properties with their in vitro counterparts
Source: PubMed Central journal article supplement (PMC4551988; doi:10.1038/srep13559), 2015-08-28
Supplement: srep13559-s1.pdf [file srep13559-s1.pdf]

**Supplementary information**

***In vivo* reprogrammed pluripotent stem cells from teratomas share analogous properties with their *in vitro* counterparts**

**Hyun Woo Choi, Jong Soo Kim, Yean Ju Hong, Hyuk Song, Han Geuk Seo, and Jeong Tae Do**

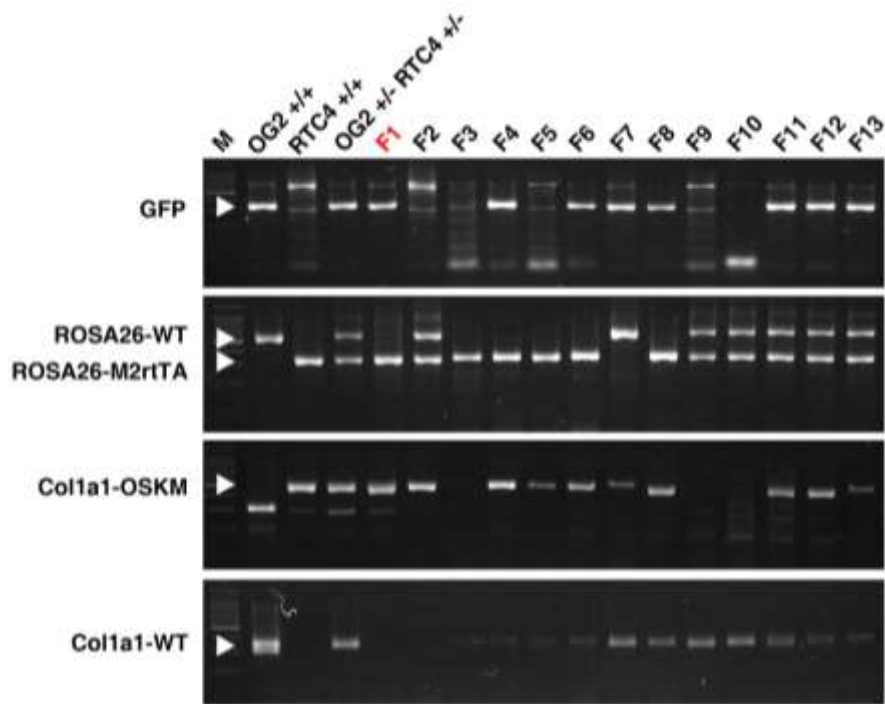

**Figure S1. Genotyping of *Oct4*-GFP, reprogramming gene (Oct4, Klf4, Sox2, and c-Myc), and reverse tetracycline-controlled transactivator (rtTA) by PCR.** The founder 1 (F1) mouse is homozygous for the transcriptional activator (ROSA26-M2rtTA) and doxycycline-inducible polycistronic cassette encoding the 4 reprogramming factors OSKM within the *Col1a1* locus, and heterozygous for *Oct4*-GFP transgene ( $\Delta$ PE). This F1 is named as rOG2 (for reprogrammable OG2) mouse.

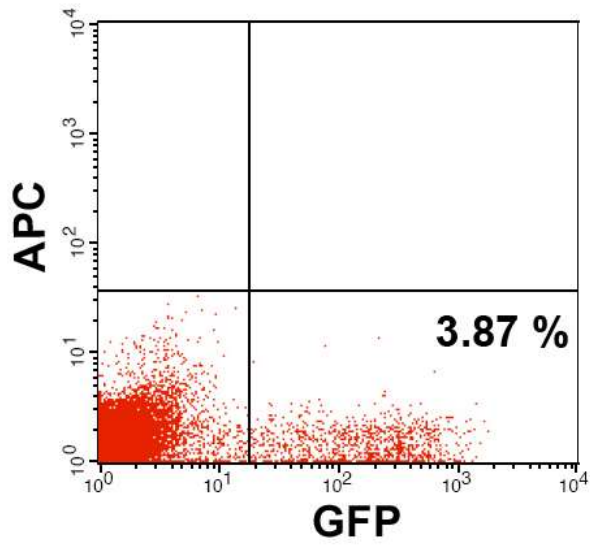

**Figure S2. FACS analysis of the teratomas from rOG2 mouse.** Teratomas formed in rOG2 mouse contain about  $3.87\% \pm 0.02$  (mean  $\pm$  SD) of the *Oct4*-GFP positive cells.

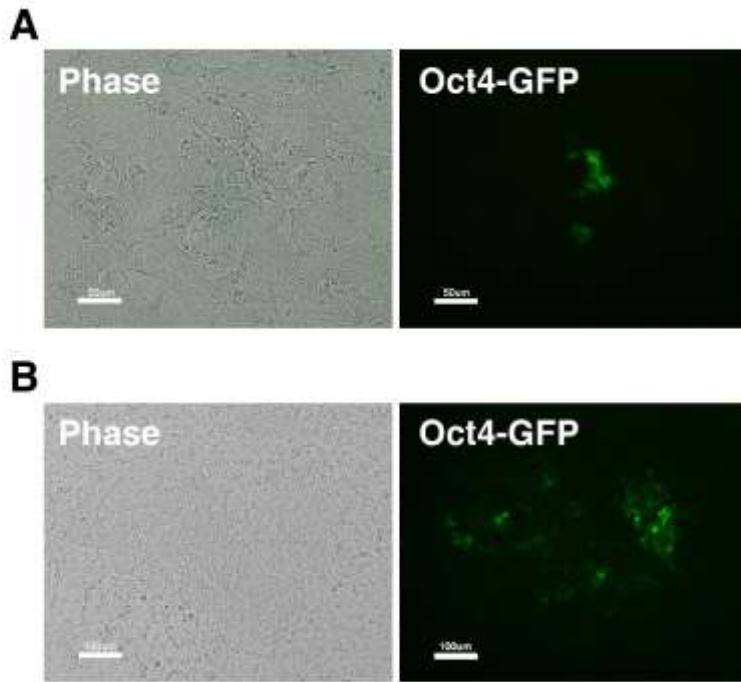

**Figure S3. Reprogramming of rOG2 somatic cells.** NSCs (A) and MEFs (B) could be reprogrammed *in vitro* into pluripotent *Oct4-GFP*<sup>+</sup> cells by treatment of doxycycline. *Oct4-GFP*<sup>+</sup> colonies were observed at day 13 and 15, respectively. Scale bar = 50 and 100 μm

**A**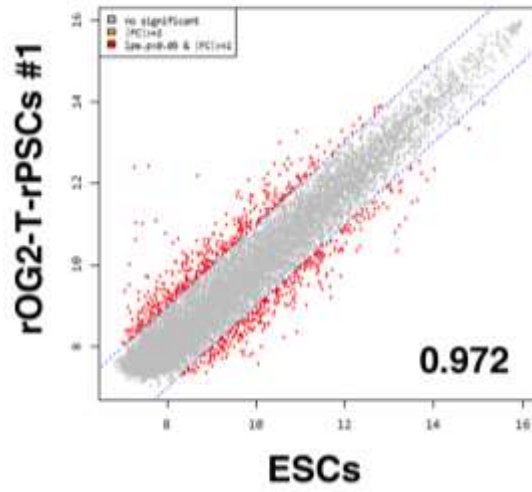**B**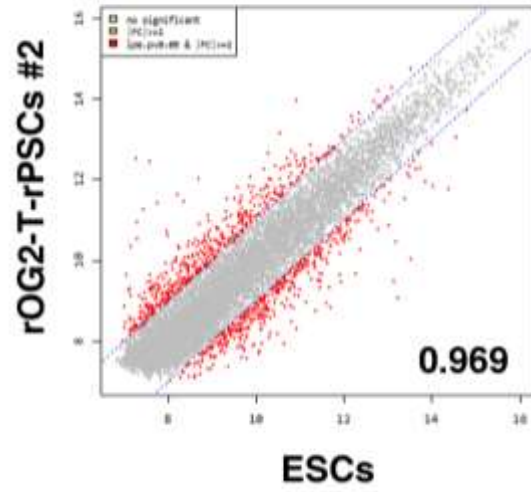

Figure S4. Similarity of the gene expression patterns between ESCs and rOG2-T-iPSCs #1 and #2.

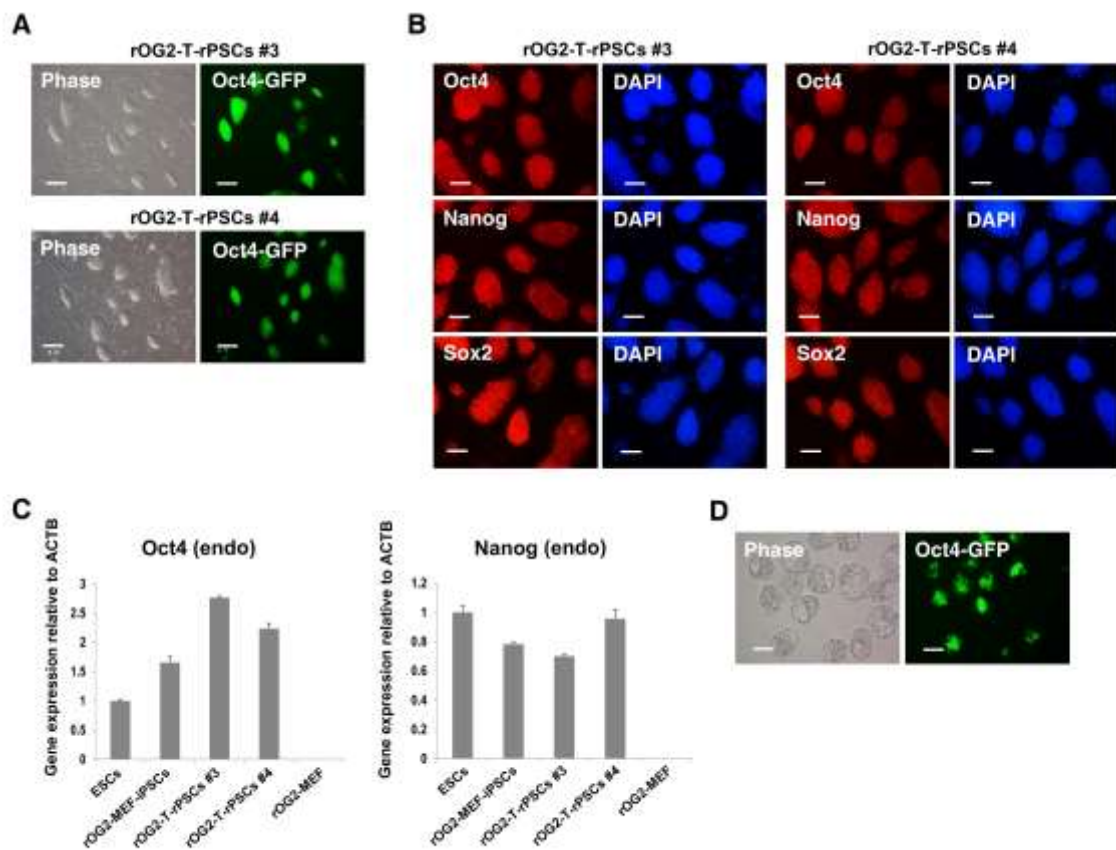

**Figure S5. Characterization of rOG2-T-rPSCs #3 and #4.** (A) Phase and fluorescence microscope images of rOG2-T-rPSCs #3 and #4. (B) Immunocytochemistry experiment for Oct4, Nanog, and Sox2 in rOG2-T-rPSCs #3 and #4. (C) Real time RT-PCR showed that rOG2-T-rPSCs #3 and #4 expressed Oct4 and Sox2 like ESCs. (D) rOG2-T-rPSCs #3 could incorporate into ICM of blastocyst, but not trophectoderm.

**Supplementary Table 1. Gene ontology analysis of the upregulated gene in rOG2-T-iPSCs**

| Annotation Cluster 1  |       | Enrichment Score: 2.63                                                                                                                                |          |           |
|-----------------------|-------|-------------------------------------------------------------------------------------------------------------------------------------------------------|----------|-----------|
| GO term               | Count | Genes                                                                                                                                                 | P_Value  | Benjamini |
| apoptosis             | 20    | IRAK2, BCL10, E2F2, PDCD11, PDCD10, TNFRSF12A, PGLYRP1, PIM2, DIDO1, BCL2L11, PPM1F, BNIPL, BOK, ID1, KRT8, ACIN1, GADD45B, DEDD2, PHLDA1, PEG3       | 2.00E-03 | 4.50E-01  |
| cell death            | 21    | IRAK2, BCL10, E2F2, KLK8, PDCD11, PDCD10, TNFRSF12A, PGLYRP1, PIM2, DIDO1, BCL2L11, PPM1F, BNIPL, BOK, ID1, KRT8, ACIN1, GADD45B, DEDD2, PHLDA1, PEG3 | 2.30E-03 | 4.40E-01  |
| programmed cell death | 20    | IRAK2, BCL10, E2F2, PDCD11, PDCD10, TNFRSF12A, PGLYRP1, PIM2, DIDO1, BCL2L11, PPM1F, BNIPL, BOK, ID1, KRT8, ACIN1, GADD45B, DEDD2, PHLDA1, PEG3       | 2.40E-03 | 4.10E-01  |
| death                 | 21    | IRAK2, BCL10, E2F2, KLK8, PDCD11, PDCD10, TNFRSF12A, PGLYRP1, PIM2, DIDO1, BCL2L11, PPM1F, BNIPL, BOK, ID1, KRT8, ACIN1, GADD45B, DEDD2, PHLDA1, PEG3 | 3.00E-03 | 3.40E-01  |

| Annotation Cluster 2 |       | Enrichment Score: 2.17                                                                                                                                                                                                              |          |           |
|----------------------|-------|-------------------------------------------------------------------------------------------------------------------------------------------------------------------------------------------------------------------------------------|----------|-----------|
| GO term              | Count | Genes                                                                                                                                                                                                                               | P_Value  | Benjamini |
| cell cycle           | 30    | E2F2, S100A6, SEPT1, CCNT1, PTTG1, CHEK2, SESN1, SPC24, CCNE1, RSPH1, OVOL1, TXNIP, NASP, AK1, 1190002H23RIK, LOC100045040, MYH9, KLHDC3, NCAPD2, CCND1, CDKN1A, RCC2, RASSF1, NUDC-PS1, CALM3, AKAP8, RUVBL1, SMC1A, SEPT6, TXNL4A | 8.70E-06 | 1.30E-02  |
| cell division        | 15    | SEPT1, CCNT1, PTTG1, MYH9, NCAPD2, SPC24, CCNE1, CDC42, CCND1, RCC2, NUDC-PS1, RUVBL1, SMC1A, SEPT6, TXNL4A                                                                                                                         | 1.30E-03 | 6.20E-01  |

|                    |    |                                                                                                                                   |          |          |
|--------------------|----|-----------------------------------------------------------------------------------------------------------------------------------|----------|----------|
| cell cycle process | 18 | AK1, PTTG1, MYH9, SESN1, KLHDC3, NCAPD2, SPC24, CCND1, CDKN1A, RCC2, RSPH1, RASSF1, OVOL1, NUDC-PS1, RUVBL1, AKAP8, SMC1A, TXNL4A | 1.80E-03 | 5.10E-01 |
| M phase            | 13 | PTTG1, MYH9, NCAPD2, KLHDC3, SPC24, RCC2, RSPH1, OVOL1, NUDC-PS1, RUVBL1, AKAP8, SMC1A, TXNL4A                                    | 9.80E-03 | 5.10E-01 |

|                             |                               |                                                            |                |                  |  |
|-----------------------------|-------------------------------|------------------------------------------------------------|----------------|------------------|--|
| <b>Annotation Cluster 3</b> | <b>Enrichment Score: 1.76</b> |                                                            |                |                  |  |
| <b>GO term</b>              | <b>Count</b>                  | <b>Genes</b>                                               | <b>P_Value</b> | <b>Benjamini</b> |  |
| angiogenesis                | 9                             | BMP4, RTN4, PDGFA, TNFRSF12A, EDN1, PLCD1, MYH9, SRF, THY1 | 4.50E-03       | 3.90E-01         |  |

|                                         |                               |                                              |                |                  |  |
|-----------------------------------------|-------------------------------|----------------------------------------------|----------------|------------------|--|
| <b>Annotation Cluster 4</b>             | <b>Enrichment Score: 1.57</b> |                                              |                |                  |  |
| <b>GO term</b>                          | <b>Count</b>                  | <b>Genes</b>                                 | <b>P_Value</b> | <b>Benjamini</b> |  |
| hexose catabolic process                | 6                             | ALDOA, LDHC, TPI1, PGD, PGAM1, MDH2          | 3.30E-03       | 3.50E-01         |  |
| glucose catabolic process               | 6                             | ALDOA, LDHC, TPI1, PGD, PGAM1, MDH2          | 3.30E-03       | 3.50E-01         |  |
| monosaccharide catabolic process        | 6                             | ALDOA, LDHC, TPI1, PGD, PGAM1, MDH2          | 3.90E-03       | 3.70E-01         |  |
| carbohydrate catabolic process          | 7                             | ALDOA, LDHC, TPI1, PGD, PGAM1, PGLYRP1, MDH2 | 5.00E-03       | 4.00E-01         |  |
| cellular carbohydrate catabolic process | 6                             | ALDOA, LDHC, TPI1, PGD, PGAM1, MDH2          | 6.20E-03       | 4.30E-01         |  |
| alcohol catabolic process               | 6                             | ALDOA, LDHC, TPI1, PGD, PGAM1, MDH2          | 8.70E-03       | 5.10E-01         |  |

|                             |                               |                                                                                                |                |                  |  |
|-----------------------------|-------------------------------|------------------------------------------------------------------------------------------------|----------------|------------------|--|
| <b>Annotation Cluster 5</b> | <b>Enrichment Score: 1.56</b> |                                                                                                |                |                  |  |
| <b>GO term</b>              | <b>Count</b>                  | <b>Genes</b>                                                                                   | <b>P_Value</b> | <b>Benjamini</b> |  |
| M phase                     | 13                            | PTTG1, MYH9, NCAPD2, KLHDC3, SPC24, RCC2, RSPH1, OVOL1, NUDC-PS1, RUVBL1, AKAP8, SMC1A, TXNL4A | 9.80E-03       | 5.10E-01         |  |



**Supplementary Table 2. Gene ontology analysis of the downregulated gene in rOG2-T-iPSCs**

| Annotation Cluster 1   | Enrichment Score: 1.86 |                                                |          |           |
|------------------------|------------------------|------------------------------------------------|----------|-----------|
| GO term                | Count                  | Genes                                          | P_Value  | Benjamini |
| cell redox homeostasis | 7                      | GLRX3, TXNDC12, AIFM1, DLD, PDIA6, TXN1, DDIT3 | 4.30E-04 | 4.50E-01  |

**Supplementary Table 3. KEGG pathway analysis of upregulated genes in rOG2-T-iPSCs**

| KEGG_PATHWAY          | Count | Genes                                                               | P-Value  | Benjamini |
|-----------------------|-------|---------------------------------------------------------------------|----------|-----------|
| p53 signaling pathway | 8     | CCNE1, CDKN1A, CCND1, RRM2, SFN, CHEK2, GADD45B, SESN1              | 6.00E-04 | 6.80E-02  |
| Cell cycle            | 10    | CCNE1, E2F2, CDKN1A, CCND1, YWHAG, PTTG1, SFN, CHEK2, GADD45B, SMC1 | 1.50E-03 | 8.50E-02  |

**Supplementary Table 4. KEGG pathway analysis of downregulated genes in rOG2-T-iPSCs**

| KEGG_PATHWAY                               | Count | Genes                                  | P-Value  | Benjamini |
|--------------------------------------------|-------|----------------------------------------|----------|-----------|
| Propanoate metabolism                      | 5     | ALDH6A1, ACSS1, ACSS2, PCCB, ALDH3A2   | 8.00E-04 | 8.20E-02  |
| Pyruvate metabolism                        | 5     | ACSS1, AKR1B3, DLD, ACSS2, ALDH3A2     | 2.60E-03 | 1.30E-01  |
| Glycolysis / Gluconeogenesis               | 6     | ACSS1, DLD, ENO2, ACSS2, ALDH3A2, ENO1 | 2.70E-03 | 9.20E-02  |
| Valine, leucine and isoleucine degradation | 5     | ALDH6A1, DLD, PCCB, ALDH3A2, HADHB     | 4.00E-03 | 1.00E-01  |
